# Supplementary material for: CTAB-Assisted Fabrication of Bi2WO6 Thin Nanoplates with High Adsorption and Enhanced Visible Light-Driven Photocatalytic Performance
Source: MDPI journal article supplement (doi:10.3390/molecules22050859), 2017-05-22
Supplement: s1 [file s1]

## Supplementary Materials

# CTAB-Assisted Fabrication of $\text{Bi}_2\text{WO}_6$ Thin Nanoplates with High Adsorption and Enhanced Visible Light-Driven Photocatalytic Performance

Yuxue Zhou, Pengfei Lv, Xiangdong Meng, Yanping Tang, Pingping Huang, Xiaobing Chen, Xiaoshuang Shen and Xianghua Zeng

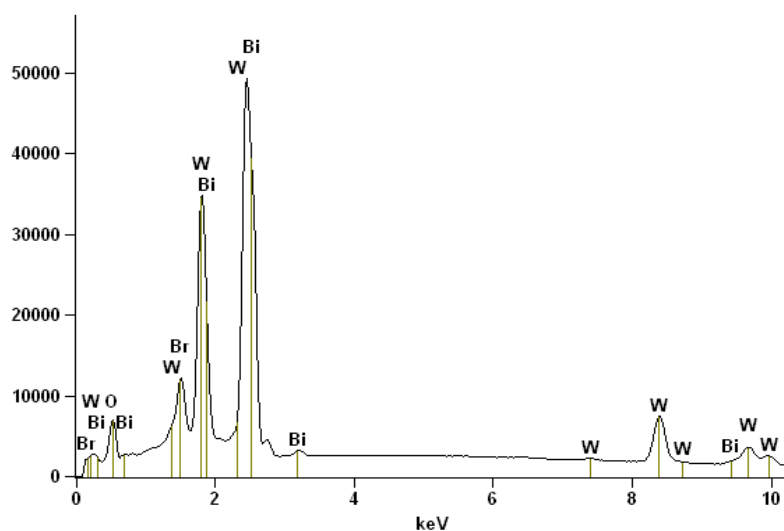

Figure S1. EDS pattern of  $\text{Bi}_2\text{WO}_6$  thin nanoplates prepared at  $180^\circ\text{C}$  for 20h.

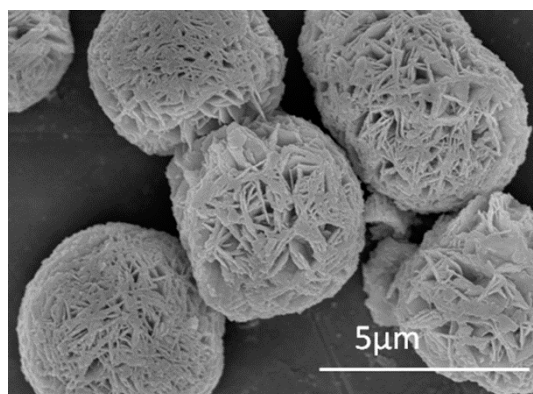

Figure S2. SEM images of  $\text{Bi}_2\text{WO}_6$  microspheres,  $180^\circ\text{C}$ , 20h.

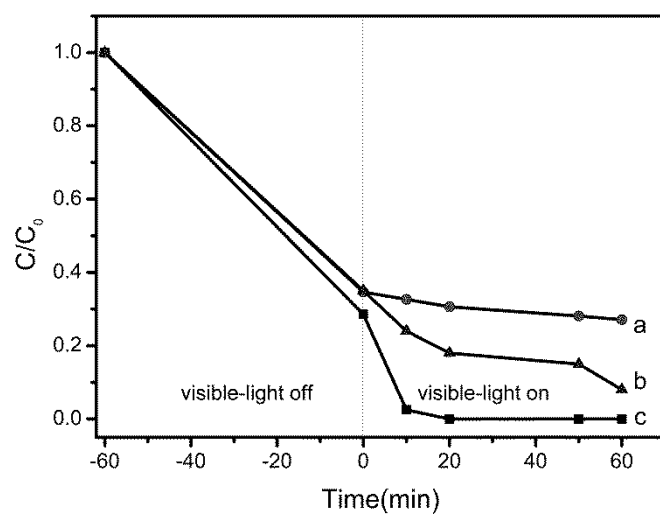

Figure S3. Comparison of photocatalytic activities on degradation of different concentration of RhB from  $\text{Bi}_2\text{WO}_6$  nanoplates (a)  $2.5 \times 10^{-5}$ , (b)  $1 \times 10^{-5}$ , (c)  $2 \times 10^{-6}$ .

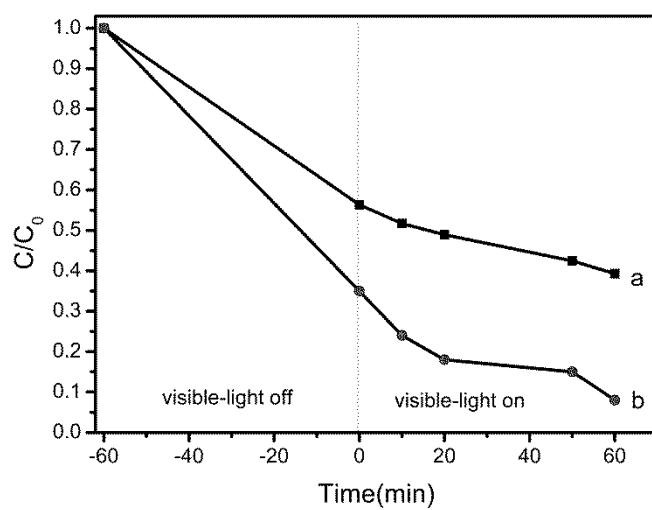

Figure S4. Comparison of photocatalytic activities on degradation of RhB ( $1 \times 10^{-5}$ ) from different amounts of  $\text{Bi}_2\text{WO}_6$  nanoplates (a) 20mg, (b) 50mg.

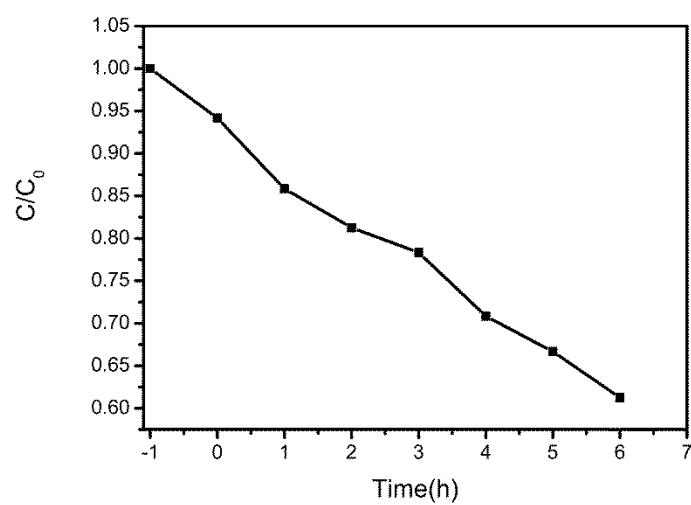

Figure S5. Photocatalytic activity on degradation of color-less phenol (15mg/L) of Bi<sub>2</sub>WO<sub>6</sub> nanoplates.
